# Supplementary material for: Survey of the Transcription Factor Responses of Mouse Lung Alveolar Macrophages to Pneumocystis murina
Source: MDPI journal article supplement (doi:10.3390/pathogens10050569), 2021-05-08
Supplement: s1 [file s1]

**Supplementary Materials:**

**“Survey of the Transcription Factor Response of Mouse Lung Alveolar Macrophages to *Pneumocystis murina*”**

TJ Kottom, AH Limper, et al.

**Table S1**

| Gene Name    | Forward Primer        | Reverse Primer         |
|--------------|-----------------------|------------------------|
| <i>Hif1a</i> | CCCATTCTCATCCGTCAAATA | CCTGTGGTGACTTGTCCTTTAG |
| <i>Pparg</i> | GAAGGCTGTAAGGGCTTCTTT | GTAGGCTTCGTGGATTCTCTTG |
| <i>B2M</i>   | CTCGGTGACCCTGGTCTTTC  | GGATTTC AATGTGAGGCGGG  |

**Supplementary Figure S1**

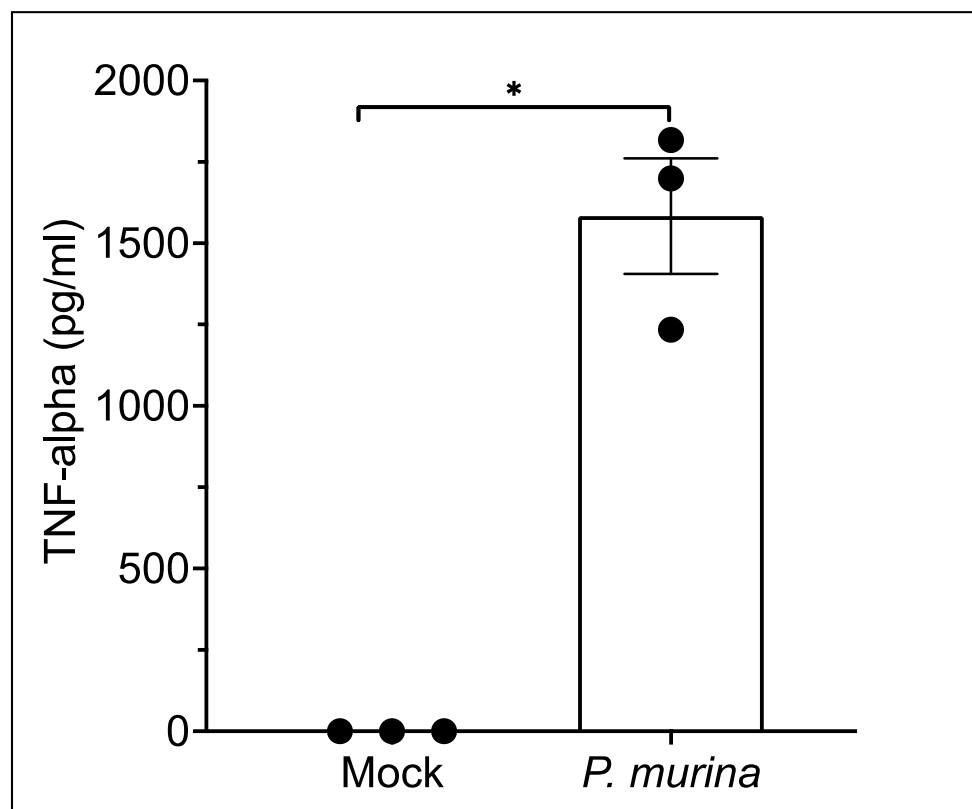

**Figure S1.** TNF-alpha ELISA of the supernatants of the three alveolar macrophage (AM) isolations used for the initial Qiagen RT<sup>2</sup>-PCR TF array. The bar graph represents the results from three independent experiments, with duplicate wells analyzed per condition. \*  $p < 0.05$ .
